# Supplementary material
Source: PubMed Central journal article supplement (PMC3136252)
Supplement: 1100404108_pnas.201100404SI.pdf [file 1100404108_pnas.201100404SI.pdf]

# Supporting Information

Sexton et al. 10.1073/pnas.1100404108

## SI Materials and Methods

**Two-Component Mixture Regression Summary.** Two-component mixture regression models (zeroinfl procedure in the pscl package; R statistical software, version 2.9.2) (1, 2) were used to predict the likelihood of nonzero fruit mass (i.e., zero-inflation submodel) and differences in fruit mass (i.e., count submodel). The count data best conformed to the Poisson distribution, so this distribution was used within the count submodel. The best performing model (determined from Akaike information criterion and maximized log-likelihood) included all variables [block, gene flow (cross class), transect] in both submodels. Likelihood ratio tests (lrtest procedure in the lmtest package; R software) were used to test for the effects of each variable within the zero-inflation and count submodels by comparing the full model against

reduced models lacking the variable of interest. The block effect was not significant in the zero-inflation submodel ( $\chi^2 = 3.999$ ;  $P = 0.135$ ), but was significant in the count submodel ( $\chi^2 = 1316.5$ ;  $P < 0.001$ ). The effect of transect was marginally significant in the zero-inflation submodel ( $\chi^2 = 3.427$ ;  $P < 0.064$ ) and significant in the count submodel ( $\chi^2 = 1755.2$ ;  $P < 0.001$ ). The effect of cross class was significant in the zero-inflation ( $\chi^2 = 12.867$ ;  $P < 0.005$ ) and count submodels ( $\chi^2 = 509.51$ ;  $P < 0.001$ ), indicating differences among gene flow treatments in the likelihood of survival to reproduction and in reproductive output. Edge-to-edge gene flow had the largest effect estimate for both survival to reproduction and reproductive output. Effect estimates for each treatment level, compared with selfed progeny and transect 1, are given in Table S2.

1. Zeileis A, Kleiber C, Jackman S (2008) Regression models for count data in R. *J Stat Softw* 27:1–25.

2. Lambert D (1992) Zero-inflated Poisson regression, with an application to defects in manufacturing. *Technometrics* 34:1–14.

**Table S1. Population information for experimental gene flow study**

| Site                                              | Latitude/longitude | MAT (°C) | WQPPTN (mm) | Elevation (m) | Forest type       | $F \pm SE$    |
|---------------------------------------------------|--------------------|----------|-------------|---------------|-------------------|---------------|
| Edge 1*, Big Sandy Ridge, Sierra National Forest  | 37.0410, –119.4068 | 13.5     | 429         | 1,000         | Foothill woodland | 0.922 ± 0.021 |
| Center 1, Grand Bluff, Sierra National Forest     | 37.0771, –119.2299 | 9.8      | 458         | 1,670         | Lower montane     | 0.867 ± 0.020 |
| Edge 2, Tuolumne River, Yosemite National Park    | 37.9215, –119.8189 | 12.4     | 432         | 1,020         | Foothill woodland | 0.953 ± 0.016 |
| Center 2, Turtleback Dome, Yosemite National Park | 37.7121, –119.7061 | 10.0     | 479         | 1,560         | Lower montane     | 0.890 ± 0.030 |

Mean annual temperature (MAT) and precipitation of the wettest quarter/season (WQPPTN) estimates were generated from the WorldClim dataset (1). Mean Fixation index values ( $F$ ) for each population were estimated across 11 codominant markers.

\*Range limit common garden site.

1. Hijmans RJ, Cameron SE, Parra JL, Jones PG, Jarvis A (2005) Very high resolution interpolated climate surfaces for global land areas. *Int J Climatol* 25:1965–1978.

**Table S2. Zero-inflated regression effect estimate coefficients and SEs for each treatment level within the zero-inflation and count submodels**

| Response level          | Coefficient estimate | SE    |
|-------------------------|----------------------|-------|
| Count submodel          |                      |       |
| Local-edge crosses      | 0.035                | 0.029 |
| Edge–edge crosses       | 0.376                | 0.026 |
| Center–edge crosses     | 0.108                | 0.031 |
| Transect 2              | 0.642                | 0.016 |
| Zero-inflation submodel |                      |       |
| Local-edge crosses      | –1.116               | 0.722 |
| Edge–edge crosses       | –1.959               | 0.688 |
| Center–edge crosses     | –0.197               | 0.842 |
| Transect 2              | –0.838               | 0.463 |

Effect estimates are shown in comparison with selfed progeny and transect 1.

**Table S3. Pairwise estimation of population differentiation among edge and center study populations**

| Population       | Foothill edge 1     | Foothill edge 2     | Montane center 1  |
|------------------|---------------------|---------------------|-------------------|
| Foothill edge 2  | 0.175 (0.112–0.245) | —                   | —                 |
| Montane center 1 | 0.067 (0.036–0.102) | 0.149 (0.097–0.207) | —                 |
| Montane center 2 | 0.189 (0.112–0.272) | 0.049 (0.018–0.074) | 0.167 (0.1–0.239) |

Values in parentheses are 95% CIs generated from bootstrapping using FSTAT 2.9.3.2 (1).

1. Goudet J (2001) FSTAT: A program to estimate and test gene diversities and fixation indices (version 2.9.3). Available at [www2.unil.ch/popgen/softwares/fstat.htm](http://www2.unil.ch/popgen/softwares/fstat.htm). Accessed November 1, 2010.

**Table S4. Markers used for population genetic analysis**

| Primer   | Linkage group | Forward                  | Reverse                  |
|----------|---------------|--------------------------|--------------------------|
| MgSTS423 | 6             | TCTGATCTCTCGAACCTCTCG    | ATCTAGCTCGCACCAACTCC     |
| MgSTS641 | 5             | GGCAATCTTCAGCTCTCTGG     | GCTGCCTTGAGGTGTTGG       |
| MgSTS617 | 2             | CGCCTTGGAAGAGTTAATCG     | ATCGTTGGATCTCGTTGTCC     |
| AAT308   | 12            | TTACACGGTCGTCAAAGTGG     | TGAATCCCATCACGTAAACC     |
| AAT261   | 7             | CTCAAGCATCTGCTACGCG      | TTCAGTGCTTTATTTAATCTTGG  |
| AAT217   | 8             | CCACAGAGAGGATTGGGTGT     | TGAGCAGCTAAAAATGGAGG     |
| AAT267   | 1             | ATCCAATCTTTGGAATAACATC   | TCACTTCATTACAAGTGACCTAGC |
| AAT222   | 9             | ACGGTAAAAAATGTGCCTGA     | GGAGACGAGGGGTTTTACAG     |
| AAT374   | 10            | ATTCCGTTGCTGTCGGATCA     | ACTGAAGCTTATTCGCGCCA     |
| AAT356   | 11            | CAGCAACGGCCTCACTAATG     | GGCGGAACCAGAATTTTATG     |
| AAT240   | 13            | CCCCTTTAACCCTATATAATAACC | AGTGTGTGGGATTGAAAAGAA    |
